1 Inhibition of JAK-STAT pathway corrects salivary gland inflammation and interferon driven  
2 immune activation in Sjögren's Disease.

3 Sarthak Gupta<sup>1†</sup>, Eiko Yamada<sup>2†</sup>, Hiroyuki Nakamura<sup>3</sup>, Paola Perez<sup>2</sup>, Thomas J.F. Pranzatelli<sup>3</sup>,  
4 Kalie Dominick<sup>2</sup>, Shyh-Ing Jang<sup>2</sup>, Mehdi Abed<sup>2</sup>, Daniel Martin<sup>4</sup>, Peter Burbelo<sup>4</sup>, Changyu Zheng<sup>4</sup>,  
5 Ben French<sup>3</sup>, Ilias Alevizos<sup>2</sup>, Zohreh Khavandgar<sup>2,5</sup>, Margaret Beach<sup>5</sup>, Eileen Pelayo<sup>5</sup>, Brian  
6 Walitt<sup>5</sup>, Sarfaraz Hasni<sup>1</sup>, Mariana J. Kaplan<sup>1,6</sup>, Mayank Tandon<sup>2</sup>, M. Teresa Magone<sup>7</sup>, David E.  
7 Kleiner<sup>8</sup>, John A. Chiorini<sup>3</sup>, Alan N. Baer<sup>5</sup>, Blake M. Warner<sup>2,5†^</sup>

8 †These authors contributed equally to this work.

9 ^ - lead and supervised this work

10

11 1. Lupus Clinical Trials Unit, National Institute of Arthritis and Musculoskeletal and Skin  
12 Diseases, National Institutes of Health, Bethesda MD, USA.

13 2. Salivary Disorder Unit, National Institute of Dental and Craniofacial Research, National  
14 Institutes of Health, Bethesda, MD, USA.

15 3. Adeno-Associated Virus Biology Section, National Institute of Dental and Craniofacial  
16 Research, National Institutes of Health, Bethesda, MD, USA.

17 4. Genomics and Computational Biology Core, National Institute of Dental and Craniofacial  
18 Research, National Institutes of Health, Bethesda, MD, USA.

19 5. NIDCR Sjögren's Disease Clinic, National Institute of Dental and Craniofacial Research,  
20 National Institutes of Health, Bethesda, MD, USA.

21 6. Systemic Autoimmunity Branch, National Institute of Arthritis and Musculoskeletal and Skin  
22 Diseases, National Institutes of Health, Bethesda MD, USA.

23 7. Consult Services Section, National Eye Institute, National Institutes of Health, Bethesda MD,  
24 USA.

25 8. Laboratory of Pathology, Center for Cancer Research, National Cancer Institute, National  
26 Institutes of Health, Bethesda MD, USA.

27

28 Please address correspondence to:

29 (A) Sarthak Gupta (sarthak.gupta@nih.gov)

30 (B) Eiko Yamada (eiko.yamada@nih.gov)

31 (C) Blake M. Warner (blake.warner@nih.gov)

32

33 **Word Count:** 3994 (< 4000 words)

34 **Number of Tables:** 0

35 **Number of Figures:** 7

36 **References:** 48

37

38 **Abstract**

39 **Objectives:** Inflammatory cytokines that signal through the JAK- STAT pathway, especially  
40 interferons (IFNs), are implicated in Sjögren’s Disease (SjD). Although inhibition of JAKs is  
41 effective in other autoimmune diseases, a systematic investigation of IFN-JAK-STAT signaling  
42 and effect of JAK inhibitor (JAKi) therapy in SjD-affected human tissues has not been reported.

43 **Methods:** Human minor salivary glands (MSGs) and peripheral blood mononuclear cells  
44 (PBMCs) were investigated using bulk or single cell (sc) RNA sequencing (RNAseq),  
45 immunofluorescence microscopy (IF), and flow cytometry. *Ex vivo* culture assays on PBMCs and  
46 primary salivary gland epithelial cell (pSGEC) lines were performed to model changes in target  
47 tissues before and after JAKi.

48 **Results:** RNAseq and IF showed activated JAK-STAT pathway in SjD MSGs. Elevated IFN-  
49 stimulated gene (ISGs) expression associated with clinical variables (e.g., focus scores, anti-SSA  
50 positivity). scRNAseq of MSGs exhibited cell-type specific upregulation of JAK-STAT and ISGs;  
51 PBMCs showed similar trends, including markedly upregulated ISGs in monocytes. *Ex vivo*  
52 studies showed elevated basal pSTAT levels in SjD MSGs and PBMCs that were corrected with  
53 JAKi. SjD-derived pSGECs exhibited higher basal ISG expressions and exaggerated responses to  
54 IFN $\beta$ , which were normalized by JAKi without cytotoxicity.

55 **Conclusions:** SjD patients’ tissues exhibit increased expression of ISGs and activation of the JAK-  
56 STAT pathway in a cell type-dependent manner. JAKi normalizes this aberrant signaling  
57 at the tissue level and in PBMCs, suggesting a putative viable therapy for SjD, targeting both  
58 glandular and extraglandular symptoms. Predicated on these data, a Phase Ib/IIa randomized  
59 controlled trial to treat SjD with tofacitinib was initiated.

60

61 **Key messages** (total 3-5 sentences)

62 **What is already known on this topic?**

- 63 • Upregulation of interferons (IFNs) has been reported in patients with SjD; however, a  
64 systematic investigation of their role at a cellular and tissue level in humans is lacking.

65 **What this study adds?**

- 66 • Our findings conclusively show that the IFN-JAK-STAT pathway is activated in the  
67 salivary glands and PBMCs in patients with SjD
- 68 • Specific cells in the MSGs (infiltrating lymphocytes, epithelial, antigen presenting cells,  
69 and endothelial cells) and in PBMCs (monocytes, NK cells, and dendritic cells) drive this  
70 IFN signature.
- 71 • We pinpoint cells responsive to JAK inhibition and illustrate in patient tissues that JAK  
72 inhibitors may be beneficial in SjD by uncoupling the pathogenic cytokine milieu and  
73 resultant epithelial tissue damage and dysfunction central to SjD.

74 **How this study might affect research, practice, or policy?**

- 75 • SjD lacks an approved, efficacious and targeted therapy. Several large clinical trials have  
76 been unsuccessful due in part to a lack of biologically relevant endpoints or predictive  
77 biomarkers. We establish a multimodal testing platform using human tissues from SjD  
78 patients to identify actionable targets and to directly test treatment effects. Our data suggest  
79 that blocking the IFN-JAK-STAT pathway by using JAKi is a rational therapy for SjD.  
80 Moreover, these data can also serve as biological endpoints for clinical trials  
81 [NCT04496960].

82

83 **Keywords** (< 5): Sjögren's Disease, Interferon, Janus kinases, STAT, Tofacitinib

## 84 **Introduction**

85           Despite being the second most common systemic autoimmune rheumatic disease,  
86 Sjögren’s Disease (SjD) lacks a precise etiology or an approved and efficacious therapy that  
87 meaningfully manages symptoms or alters disease progression.<sup>1</sup> Concerted efforts have been  
88 expended toward identifying the pathogenic mechanisms of SjD; these efforts have led to the  
89 development and testing of many medications to treat SjD.<sup>2</sup> However, few agents met their primary  
90 endpoints until very recently, and only limited biological data accompany these studies.<sup>2</sup>

91           One of the reasons for these limitations could be the heterogeneous clinical presentation of  
92 patients with SjD. Chronic inflammatory lymphocytic infiltration of the exocrine glands leading  
93 to dysfunction and ultimate destruction of the tissue is characteristic of SjD. Most SjD patients  
94 present with symptoms involving the salivary and lacrimal glands. Other tissues that can be  
95 affected include: the skin; the respiratory tract nervous system, kidneys, and the vagina, along with  
96 systemic symptoms including fatigue, widespread musculoskeletal pain, and polyarthritis.<sup>3 4</sup>

97           Many of the inflammatory cytokines implicated in SjD pathogenesis, in particular Type-I  
98 and Type-II interferons (IFNs), interleukins (IL)-6, IL-7, IL-12, and IL-21, signal through the  
99 Janus Kinases (JAK)-Signal Transducer and Activator of Transcription (STAT) pathway.<sup>5</sup>  
100 However, a comprehensive understanding of IFN signaling and the involvement of the JAK-STAT  
101 pathway in SjD tissues is lacking. Clarification of cell types driving disease pathogenesis in the  
102 peripheral blood and in the salivary glands will facilitate the development of targeted therapies for  
103 SjD.

104           In this study, we aimed to characterize JAK-STAT pathway utilization in SjD-affected  
105 tissues and establish a human-tissue-based experimental rationale for examining the efficacy of  
106 JAK inhibitors (JAKi) in SjD participants. We used an ‘omics’ platform to identify high-potential

107 tractable pathways in the affected tissue compartments in SjD. We first performed ‘bulk’ RNA  
108 sequencing (RNAseq) on minor salivary glands (MSGs) from patients with SjD and demonstrated  
109 activation of the JAK-STAT pathway. These findings were corroborated using immunofluorescent  
110 staining (IF) of salivary glands, and flow cytometry analysis of the salivary glands and peripheral  
111 blood mononuclear cells (PBMCs) from patients with SjD. Using single cell RNAseq (scRNAseq),  
112 we were able to identify cells in the glands and peripheral blood that upregulate IFNs through the  
113 JAK-STAT pathway in MSGs and then confirmed these findings using flow cytometry and *ex vivo*  
114 culture assays. Finally, we used patients’ tissues and primary cell models to show that JAKi can  
115 correct this altered pathway activation without cytotoxicity as a high-potential targeted therapy for  
116 SjD.

117

## 118 **Materials and Methods**

### 119 *Subjects and ethical approval*

120 Study subjects provided informed consent prior to the initiation of any study procedure,  
121 and they were evaluated and classified comprehensively according to 2016 American College of  
122 Rheumatology (ACR) and the European League Against Rheumatism (EULAR) classification  
123 criteria.<sup>6</sup> Comparator group included subjects who did not meet 2016 ACR-EULAR criteria (non-  
124 SjD) or healthy volunteers (HV).<sup>7</sup> All subjects were screened for evidence of systemic  
125 autoimmunity and received comprehensive oral/sialometric, rheumatological, and  
126 ophthalmological investigations. Clinical investigations were conducted in accordance with the  
127 Declaration of Helsinki principles. All studies using human samples were approved by the NIH  
128 IRB (15-D-0051, NCT00001390; 11-D-0172, NCT02327884, or 94-D-0018, NCT00001196; PI-  
129 Warner).

130 ***Patient and Public Involvement***

131 Patients or the public were not involved in the design, or conduct, or reporting, or dissemination  
132 plans of our research.

133 ***Human Salivary Gland RNA Sequencing***

134 Bulk RNA sequencing was performed as previously described.<sup>8</sup> RNAseq data that passed quality  
135 control was deposited in dbGaP: phs001842.v1.p1.

136 ***Single Cell RNA Sequencing of the MSGs and PBMCs***

137 MSG biopsies and PBMCs were processed for scRNAseq as previously described (**supplemental**  
138 **table 1**).<sup>9 10</sup> scRNAseq data sets were analyzed in Python using Scanpy.

139 ***Immunofluorescence microscopy and analysis on MSGs***

140 *Detection of JAK1 and JAK3 in MSG.* FFPE MSG sections were processed following standard  
141 procedures. Sections were blocked, incubated in antibodies, and mounted (**supplemental table 2**).

142 *Immunofluorescence in primary cell culture assays.* Primary salivary gland epithelial cells  
143 (pSGECs) were plated on chamber slides and stimulated as indicated, then stained with antibodies  
144 (**supplemental table 2**). Images were acquired on Nikon A1 HD (Nikon) confocal microscope  
145 and processed with CellProfiler in ImageJ (Broad Institute).<sup>11</sup>

146 ***Flow cytometry***

147 Freshly biopsied MSGs were dissociated as described above. Multicolor flow cytometry was used  
148 to quantify the phosphorylation status of pSTATs in gated cell subset populations (**supplemental**  
149 **table 2** and **supplemental method 1, 2**).

150 ***Assessment of serum proteome***

151 Proteomic profiles were measured in serum (50 $\mu$ L) using the SOMAscan Assay V1.3 (SomaLogic,  
152 Inc.) at the Trans-NIH Center for Human Immunology, Autoimmunity, and Inflammation,  
153 National Institutes of Health as previously reported.<sup>12</sup>

#### 154 ***RNA isolation and RT-qPCR***

155 Standard Taqman assays (**supplemental table 3**) were performed to measure relative gene  
156 expression.

#### 157 ***Statistical Analysis for Difference in Immune Cell Populations/Cytokines***

158 Statistical methods were employed using GraphPad Prism (GraphPad), MATLAB, or -R as  
159 described, and the type and nature of the data were considered when assessing differences in mean  
160 values and variances across biological and experimental replicates. A *p*-value of <0.05 was  
161 considered statistically significant.

162

### 163 **Results**

#### 164 ***Genes in the JAK-STAT and Type-I IFN pathways are upregulated in MSGs from patients with***

#### 165 ***SjD***

166 To understand the transcriptome wide impacts of SjD on the MSGs, we first performed  
167 ‘bulk’ RNAseq on SjD and HV MSGs (**figure 1A**). Unsupervised clustering generally segregated  
168 SjD from HV MSGs based on differentially expressed genes (DEGs) (**figure 1B, C**). MSGs from  
169 SjD subjects were transcriptionally more active. Immune pathway genes, including ISGs (e.g.,  
170 *IFI44L, IFI44, MX1, CXCL13*), were upregulated in SjD whereas canonical salivary genes were  
171 downregulated (**figure 1B, C**). Pathway enrichment analysis identified the *JAK-STAT Pathway* as  
172 one of the top significantly and differentially utilized pathway in SjD (**figure 1D**). Gene  
173 enrichment analysis showed consistent and direct regulation of the JAK-STAT pathway signaling



174 through *IL7/IL15/IL21* via *JAK3* (**supplemental figure 1B**). We examined the mRNA expression  
175 of JAK genes and found that *JAK1* had the highest expression in all MSGs whether they were from  
176 SjD or HV. However, when comparing MSGs from SjD to those from HV, *JAK2* and *JAK3*, but  
177 not *JAK1* or *TYK2*, expression was differentially increased (**supplemental figure 1C**).

178 Although the bulk RNAseq was unable to reliably detect Type-I IFN transcripts, these data  
179 demonstrated increased *IFNG* (**supplemental figure 1D**). Thus, we employed surrogate readouts  
180 of Type-I and Type-II IFN gene expression using validated composite Type-I (21-gene)<sup>13 14</sup> and  
181 Type-II (8-gene)<sup>15-17</sup> IFN scores to demark patients with enhanced JAK-STAT pathway signaling.  
182 Calculated Type-I and Type-II IFN scores<sup>18</sup> revealed 2-fold and 2.5-fold mean increases,  
183 respectively, in SjD patients' MSGs compared to HV glands ( $p=0.0033$  and  $p=0.0009$ ,  
184 respectively; **figure 1E, G**). Of the 24 SjD subjects, 17 (71%) had elevated Type-I or Type-II ISG  
185 scores; 7 exhibited elevations in both Type-I and Type-II IFN ISGs; while 5 each exhibited  
186 elevated Type-I or Type-II ISGs. Seven did not show significant elevation of either and were  
187 enriched for anti-SSA antibody negative subjects (5/7) (**figure 1E, G**). Type-I and Type-II ISG  
188 scores exhibited modest, positive, statistically significant correlation, but not all the variance was  
189 explained.

190 Increased lymphocytic infiltration, quantified as a focus score (FS), is an independent  
191 predictor of deterioration of exocrine gland function.<sup>19</sup> SjD is related to both loss of epithelial cells  
192 and greater inflammation in the glands. The Type-I and Type-II IFN scores from our bulk RNAseq  
193 positively correlated with FS in the glands; however, Type-II IFN exhibited a stronger correlation  
194 than Type-I IFN ( $R^2=0.24$ ,  $p=0.0031$  and  $R^2=0.65$ ,  $p<0.0001$ , respectively; **figure 1F, H**). Our  
195 data suggests that Type-II IFN signature serves as a surrogate for IFN $\gamma$  produced by T cells in the  
196 glands; while Type-I IFN signaling is appreciably more disease-specific and integrates the

197 contributions of the epithelial cells, dendritic cells, and monocytes in the MSG. Moreover, it is  
198 well-documented that there is positive crosstalk between Type-I IFNs ( $\alpha$  and  $\beta$ ) and Type-II IFN  
199 ( $\gamma$ ) receptor signaling. In our cohort most patients exhibited elevated Type-I signaling. Thus, we  
200 focused on Type-I signaling in subsequent experiments, acknowledging that signaling *in vivo/in*  
201 *situ* is far more complex.

202         These findings confirm that SjD pathogenesis involves IFN-JAK-STAT pathway.  
203 However, “bulk” RNAseq does not precisely and robustly predict the compositional cell types or  
204 infer the cell states changes contributing to these phenomena in SjD-affected MSG.

205

### 206 *Expression of JAK1 and JAK3 in the salivary glands is cell type-specific*

207         To pinpoint the cell types and expression levels of JAK1 and JAK3 in the MSG, we used  
208 IF, whole slide imaging and analysis, and tSNE visualization (**figure 2A**). These results revealed  
209 the expected cellular proportion changes in the MSGs. Keratin-18 expression was restricted to  
210 epithelial structures (+6%,  $p < 0.001$ ; **figure 2B, C** and **supplemental figure 2A-C**). Per-cell JAK1  
211 expression was mildly elevated in immune cells in SjD, while per-cell JAK3 expression showed  
212 both SjD-specific increased per-cell expression in epithelial cells and infiltrating immune cells in  
213 SjD (+35%,  $p < 0.0001$  and +15%,  $p < 0.0001$ , respectively; **figure 2C**). It is generally assumed that  
214 high IFN signaling is driven by infiltration of immune cells; however, the IF and RNAseq results  
215 independently confirm that signaling is directed in part by the involved epithelium.

216

### 217 *Increased phosphorylated STAT proteins in SjD MSGs confirm activation of JAK-STAT* 218 *pathway*

219 To directly confirm the activation status of the JAK-STAT pathway in MSGs, we measured  
220 the frequency of pSTAT proteins by flow cytometry in freshly biopsied and dissociated MSGs  
221 (**figure 2A**). In general, flow cytometry exhibited cellular proportion changes consistent with the  
222 IF results in the glands (**figure 2D**). The frequency of pSTAT1, pSTAT3(Ser727) and pSTAT6  
223 proteins were higher at baseline in SjD epithelial cells compared to non-SjD (2.0-fold,  $p=0.017$ ;  
224 2.9-fold,  $p=0.028$ ; and 6.9-fold,  $p=0.1080$ , respectively; **figure 2E**), directly supporting elevated  
225 activation of the JAK-STAT pathway in SjD epithelial cells. Moreover, the frequency of pSTAT  
226 proteins on immune cells showed a similar pattern in SjD-affected MSGs (1.4-fold,  $p=0.3749$ ; 2.6-  
227 fold,  $p=0.068$ ; and 1.2-fold,  $p=0.3499$ , respectively; **figure 2E**), with appreciably less significant  
228 differences.

229  
230 ***High IFN signature and activated JAK-STAT pathway in SjD MSGs is due to salivary gland***  
231 ***epithelial and infiltrating immune cells***

232 Our results implicate coordinated interactions between the epithelium and the immune  
233 infiltrate (i.e., autoimmune epithelitis).<sup>3</sup> To better understand the transcriptional impact of SjD on  
234 each cell type, we then analyzed single cell transcriptomes from MSGs from SjD and non-SjD  
235 subjects. Leiden clustering of scRNAseq data identified 11 clusters of cells representing the  
236 general cell types in the MSGs (**figure 3A** and **supplemental figure 3A, C**). Expectedly, compared  
237 to non-SjD MSGs—and consistent with both the IF and flow cytometry results—the proportion of  
238 seromucous acinar cells was reduced and immune cell infiltration was increased in SjD (**figure**  
239 **3B**). Examining the top ten DEGs in each of the cell types demonstrated that SjD cells were  
240 dominated by ISGs (**figure 3C**). A Type-I IFN score was calculated for all cells in SjD and non-  
241 SjD and was increased in all cells in SjD patients' glands (**figure 3D**). Moreover, seromucous

242 acinar cells showed increased expression of multiple *JAK* genes, while ductal cells had increased  
243 expression of *JAK3* and *TYK2* (**figure 3E** and **supplemental figure 3C, D**). These results  
244 independently confirm our bulk and proteomics data and suggest that disease-specific utilization  
245 of this pathway in unique cell types.

246

#### 247 *Sera from SjD have increased IFN Signature*

248 As a prototypic systemic autoimmune disease, additional non-exocrine organs are also  
249 commonly affected in SjD. To estimate proteomic changes in the circulation, Somalogic aptamer-  
250 based 1.3K target proteomics was performed. Most proteins were significantly upregulated in sera  
251 from SjD patients compared to controls (**figure 4B**). Consistent with MSGs data, inflammation  
252 and IFN regulated proteins were upregulated in sera. A validated 4-protein IFN score demonstrated  
253 a significant increase of IFN-stimulated proteins in SjD patients' sera compared to both non-SjD  
254 and HV sera ( $p < 0.0001$ ; **figure 4C**). These data indicate that IFN signatures in the glands are  
255 recapitulated in the blood and suggest similar pathogenic mechanisms affecting both tissue  
256 compartments.<sup>2</sup>

257

#### 258 *scRNA of PBMCs identify cells with activated JAK-STAT pathway*

259 To better understand the transcriptional impact of SjD on each cell type in the peripheral  
260 blood, single-cell transcriptomes from PBMCs from SjD and non-SjD subjects were analyzed.  
261 scRNAseq identified 10 unique general types by Leiden clustering (**figure 4D** and **supplemental**  
262 **figure 4A, B**). DEG analysis showed upregulation of many ISGs (e.g., *IFI44L*, *IFIT3*, *ISG15*, *MX1*,  
263 and *IFI6*) in SjD PBMCs (**supplemental figure 4C**). Functional annotation analysis revealed that  
264 upregulated genes were mostly associated with immune and inflammatory responses, especially

265 ‘innate immunity against virus’ and ‘Type-I IFN responses’ (**figure 4E**). Type-I IFN scores were  
266 projected on to each cell and were higher in SjD PBMCs compared to controls (**figure 4F**).  
267 Monocytes had the highest expression of ISGs in SjD, followed by dendritic cells, and then NK  
268 cells (**figure 4F**).

269

### 270 *Increased phosphorylated STAT proteins in SjD PBMCs confirmed activation of JAK-STAT* 271 *pathway in blood*

272 To directly estimate the activation of the JAK-STAT pathway in the blood, the frequencies  
273 of pSTAT proteins were measured by flow cytometry of PBMCs from patients with SjD and HVs.  
274 The frequencies of basal pSTAT proteins, pSTAT1, pSTAT3(Ser727) and pSTAT6, were higher  
275 in SjD patients compared to HVs (2.0-fold,  $p=0.007$ , 2.3-fold,  $p=0.046$ , and 1.3-fold,  $p=0.044$ ,  
276 respectively; **figure 5** and **supplemental figure 5**). Of note, pSTAT3(Ser727), but not  
277 pSTAT3(Tyr705) was significantly upregulated in SjD patients. In aggregate, these findings  
278 indicate that enhanced Type-I IFN response in PBMCs could be involved in both the systemic  
279 aspect of SjD and local inflammation after infiltration into the MSGs. Our results suggest that we  
280 could employ this tissue as a surrogate model for assessing if identified drugs are biologically  
281 effective for SjD or stratify patients amenable to pathway targeting, *a priori*.

282

### 283 *Tofacitinib inhibits Type-I IFN response in PBMCs*

284 Based on our transcriptomic and proteomic data, SjD pathogenesis may be selectively  
285 dependent on JAK3 and JAK1 in both immune and epithelial compartments. Thus, we tested the  
286 effectiveness of the JAK3/JAK1 semi-selective inhibitor, tofacitinib, in *ex vivo/in vitro* assays  
287 (**figure 6A**). Treatment with 5  $\mu$ M tofacitinib blocked STATs phosphorylation status induced by

288 IFN $\beta$  stimulation in PBMCs in all cell subsets without inducing cytotoxicity (**figure 6B** and  
289 **supplemental figure 6A, D**). scRNAseq showed that 5  $\mu$ M tofacitinib downregulated 109 DEG,  
290 nearly all of which were ISGs, and no genes were upregulated. Tofacitinib suppressed the IFN $\beta$ -  
291 induced IFN signature to baseline levels (**figure 6C, D** and **supplemental figure 6B**). Cell clusters  
292 with sufficient number of representation of samples and cells in each treatment group cluster were  
293 analyzed for top DEG by pseudobulk analysis. T cells and monocytes exhibited greater numbers  
294 of downregulated ISGs in the context of tofacitinib inhibition. ISGs were among the top DEG in  
295 all subsets after IFN $\beta$  stimulation and tofacitinib normalized this response; cell type-specific  
296 effects were less dominant (**figure 6E**). A similar direction of effect was shown in PBMCs treated  
297 with 5 $\mu$ M tofacitinib without IFN $\beta$  stimulation, though there was appreciable inter-individual  
298 variability in responsiveness to tofacitinib (**supplemental figure 6C**). These data provide clear  
299 and direct evidence, using affected human tissues from SjD patients, that *in vitro* tofacitinib can  
300 abrogate basally activated JAK-STAT signaling and suggest that responsiveness to JAK inhibition  
301 is somewhat SjD-selective. These results raised the question as to whether a similar correction  
302 could be achieved in glandular epithelial cells.

303

304 ***Tofacitinib, a JAK inhibitor, reduces Type-I IFN response in primary salivary gland epithelial***  
305 ***cells***

306 To model the glandular epithelial response to Type-I IFN and blockade by tofacitinib, we  
307 used primary salivary gland epithelial cells derived and cultured from SjD and HV. Tofacitinib at  
308 5 $\mu$ M concentration did not induce apoptosis or necrosis in pSGEC (**supplemental figure 7A, B**).  
309 Tofacitinib mitigated IFN $\beta$ -induced pSTAT1 proteins in both the nucleus and cytosol in pSGECs  
310 as assessed by IF (0.78-fold,  $p < 0.0001$ ; 0.84-fold,  $p < 0.0001$ , respectively; **figure 7B**), and dose-

311 dependently decreased IFN $\beta$ -induced ISGs mRNA expression (*CXCL10*: 0.002-fold,  $p=0.023$ ;  
312 *ISG15*: 0.03-fold,  $p=0.003$ ; *MX1*: 0.01-fold,  $p=0.009$ ; **figure 7C** and **supplemental figure 7C**).  
313 Of note, SJD-derived pSGECs exhibited an enhanced response to IFN $\beta$  stimulation (e.g., *CXCL10*:  
314 33.6-fold,  $p=0.032$ ; **figure 7C**). pSGECs treated with tofacitinib without IFN $\beta$  stimulation showed  
315 a trend towards decreased expression of ISGs, though this was not statistically significant  
316 (**supplemental figure 7D**). These results suggest that *i*) responsiveness to JAK inhibition is  
317 activation-dependent and SJD-selective, and *ii*) while activation is not retained in pSGECs *in vitro*,  
318 pSGECs do retain SJD-specific enhanced responsiveness to IFN stimulation<sup>20</sup> supporting the  
319 robustness of this model system.

320 **Discussion:**

321 Current strategies for managing SjD are ineffective in limiting disease progression or  
322 preventing the long-term decline in quality of life. Recent successes of early stage randomized  
323 controlled trials in SjD (BAFF-R, TACI, CD40, CD40L<sup>21</sup>) offer renewed optimism to patients and  
324 providers. Given the multiple intersecting pathogenic pathways driving varied clinical  
325 presentations in SjD, and a paucity of successful trials, there is continued need for biologically  
326 relevant, effective, and targeted therapeutics. Rational repurposing of approved drugs offers an  
327 exciting path to accelerate the approval of safe and effective medications for patients with SjD. To  
328 this end, we established a multimodal testing platform using human tissues from SjD patients to  
329 identify actionable targets and to directly test biological effects. Specifically, we hone-in on Type-  
330 I IFN signaling through the JAK-STAT pathway.

331 The activation of the IFN pathway in SjD patients' peripheral blood has been reported<sup>22</sup>,  
332 but the specific cell types driving this upregulation in blood or in the glands remain poorly detailed.  
333 Using transcriptomic and functional approaches on peripheral blood and MSG tissue from SjD  
334 patients, our data revealed enhanced IFN signaling via JAK-STAT in both compartments,  
335 emphasizing the therapeutic potential of this pathway. We identified cell subsets driving this  
336 activated state: monocytes, NK cells and DCs in PBMCs and infiltrating immune cells and salivary  
337 gland epithelial cells in MSGs. Our data confirm SjD-specific upregulation of ISGs and JAK-  
338 STAT pathway in salivary glands and blood, aligning with previous reports.<sup>23</sup> These cytokines,  
339 via Janus Kinases, initiate and enhance inflammation in SjD salivary glands.<sup>2 24-28</sup> Similar to a  
340 previous report, the elevated IFN signatures in MSG correlated with clinical variables including  
341 focus score and enrichment in autoantibody-positive subjects.<sup>29</sup>



342 To understand the upstream effects in SjD-affected MSG, we measured JAK genes and  
343 protein expression in the glands at single cell resolution. Among the JAK genes expressed in the  
344 MSGs, *JAK1* was most abundant and ubiquitously expressed in both SjD and non-SjD. However,  
345 JAK3 mRNA and protein expression was only elevated in SjD. Using IF on MSGs, JAK1 protein  
346 localized to immune and epithelial cells with a very slight increased expression (~6%) in SjD  
347 immune cells likely due to increased expression in APCs as found in scRNAseq. Confirming our  
348 bulk and scRNAseq data, IF showed that JAK3 protein was increased in *i*) the ductal and acinar  
349 epithelium in SjD involved by focal lymphocytic inflammation, and *ii*) in inflammatory cells  
350 within inflammatory foci. A previous report showed JAK1 staining in ductal cells, and to a lesser  
351 extent in acinar cells, in HV and SjD patients.<sup>30</sup> We extend the understanding of JAK-STAT  
352 signaling in the gland by showing the novel finding of disease-specific dependence of JAK3  
353 signaling in the ductal epithelium. These data provide guidance for rational drug selection (i.e., a  
354 JAK3/JAK1 targeting drug such as tofacitinib) whereby the epithelium and disease-specific  
355 immune infiltrates show evidence of dependence on JAK-STAT signaling through JAK3/JAK1 in  
356 SjD.

357 Deciphering the JAK-STAT pathway involvement in SjD is an exciting area of  
358 investigation. We and others have demonstrated significantly increased *IL21* and IL-21-inducible  
359 genes: *JAK3* and *STAT1* in SjD via RNAseq of MSGs.<sup>31</sup> pSTAT1 in SjD MSG biopsies has been  
360 associated with IFN- $\alpha$ , IFN- $\gamma$ , and IL-6 stimulation.<sup>32-33</sup> Very recently, pSTAT1 was shown to  
361 confer histopathological value in MSGs with or without lymphocytic foci<sup>34</sup>; however, these  
362 findings are based on weak intensity immunohistochemical staining of pSTAT1 without rigorous  
363 quantification. We now directly confirmed that pSTAT1 and pSTAT3(Ser727) are elevated in the  
364 epithelial and immune cells in the MSGs by phospho-flow cytometry from SjD subjects. It has

365 been reported that STAT protein expression is increased in immune cells of MSG.<sup>32 33 35</sup>  
366 Furthermore, our transcriptomic (bulk and sc) results show that STATs gene expressions are  
367 upregulated in SjD, and our proteomic data establishes that the levels of pSTATs are higher in SjD  
368 MSG than controls. These data further confirm that activated JAK-STAT signaling is a potentially  
369 targetable pathogenetic factor for SjD.

370 Our data supports that activation of IFN pathway in SjD is a systemic phenomenon and not  
371 constrained to the salivary glands.<sup>36</sup> Enhanced IFN response in PBMCs could be involved in both  
372 the systemic features of SjD and local inflammation after infiltration into MSGs. T cells could  
373 proliferate locally in the salivary glands, but much of their infiltration is from migration from the  
374 circulation.<sup>36</sup> In PBMCs from SjD subjects, pSTAT1 frequency was significantly higher compared  
375 to controls and was more of a general phenomenon across multiple cell subsets. On the other hand,  
376 pSTAT3(Ser727), but not -(Tyr705), were more frequently phosphorylated in SjD T cells, NK  
377 cells, and monocytes (**supplemental figure 5**). pSTAT3(Ser727) has been suggested to contribute  
378 to oxidative phosphorylation in the mitochondria with an effect that is independent of  
379 STAT3(Tyr705) phosphorylation.<sup>37</sup> Davies et al.<sup>38</sup> showed increased responses from B cells in  
380 peripheral blood from patients with SjD to TLR-7 and -9 agonism were dependent upon  
381 phosphorylation of STAT3 at the Ser727 site. It has been reported that Tyr705 phosphorylation is  
382 essential for STAT dimerization, nuclear translocation and DNA binding, whereas C-terminal  
383 Ser727 phosphorylation is required for maximal transcriptional activity.<sup>39</sup> The increased response  
384 was found to be correlated with Type-I IFN signature suggesting that pSTAT3(Ser727) plays a  
385 key role in IFN signaling in SjD patients and could be a potential molecule for targeted therapy or  
386 to monitor therapeutic effects of targeted therapies. These results support *i*) the independence of

387 Ser727 from Tyr705 on pSTAT3, and *ii*) possibly highlight patients with maximal pathway  
388 activation who may benefit from JAKi.

389 JAKi have emerged as an important new class of oral therapy for several autoimmune  
390 diseases.<sup>40 41</sup> Tofacitinib was the first oral JAK inhibitor approved for rheumatoid arthritis. It  
391 blocks JAK3 and JAK1 but also has a role in JAK2 and TYK2 inhibition.<sup>42-46</sup> Our *ex vivo*  
392 experiments using pSGECs and PBMCs consistently demonstrated that tofacitinib treatment  
393 suppressed JAK-STAT pathway activation in a dose-dependent manner, as shown by  
394 downregulated pSTAT levels, decreased IFN signature and ISG expression. Of note, basal  
395 elevations in pSTAT levels were selectively controlled by tofacitinib in SjD patients' PBMCs, but  
396 not controls. Similar to our results, recently baricitinib, a semi-selective inhibitor of JAK1 and  
397 JAK2, mitigated IFN- $\gamma$ -induced CXCL10 production in salivary gland ductal cell line.<sup>30</sup>

398 Cell type differences in responsiveness have been reported with regards to the potency of  
399 JAKi to inhibit cytokine signaling. A 3-fold difference was observed in the JAK1/TYK2-  
400 dependent IFN-stimulated pSTAT1 between CD4+ T cells and monocytes, whereas the potencies  
401 were comparable for B and NK cells.<sup>47</sup> For the reactivity of each pSTAT, JAK inhibition of  
402 JAK1/TYK2-mediated IFN $\alpha$ -driven pSTAT5 and pSTAT3 was more potent than pSTAT1,  
403 potentially demonstrating the reliance on TYK2 for regulating STAT1 phosphorylation.<sup>48</sup> In our  
404 study, pSTATs (e.g., pSTAT1, pSTAT3(Ser727), pSTAT6) in T cells showed consistent  
405 sensitivity to JAKi treatment. Other cell subsets also demonstrated pSTAT specific sensitivity (B  
406 cells – pSTAT1; NK cells–pSTAT1/6). Our findings suggest that pathogenic inflammatory  
407 signaling through specific JAKs may identify selective therapeutic drug choice.

408 Limitations of this study include relatively modest sample sizes used for fresh tissue  
409 analyses. The prospective use of fresh tissues poses logistical challenges including recruitment and

410 adequate tissue recovery for both clinical and research purposes. Despite these limitations, we  
411 demonstrate biologically meaningful changes in JAK-STAT pathway in glandular and peripheral  
412 blood samples and direct responsiveness to JAKi. These limitations are addressed by using  
413 multiple different experimental approaches to systematically and comprehensively evaluate the  
414 IFN-JAK-STAT pathway in SjD.

415 In conclusion, SjD patients have increased IFN signature with activated JAK-STAT  
416 pathway which plays a key role in both the glandular and extraglandular pathogenesis of SjD. This  
417 activation is cell specific, with salivary epithelial cells and infiltrating immune cells driving the  
418 bulk of this signature in MSGs. The activated IFN-JAK-STAT signature is also seen in peripheral  
419 blood, highlighting the dysregulated systemic immune system in SjD. Modulation of the JAK-  
420 STAT pathway, through JAKi was non-cytotoxic and effective *ex vivo* using human tissues. These  
421 results suggest tofacitinib as a potential therapeutic strategy for SjD patients and serve as the basis  
422 of an open and enrolling Phase Ib/IIa randomized controlled trial to treat SjD with tofacitinib  
423 (NCT04496960).

424 **Potential Conflicts of Interest:** BMW has Cooperative Research Award and Development  
425 Agreements [CRADA] from Pfizer, Inc., and Mitobridge, Inc. (A subsidiary of Astellas Pharma,  
426 Inc.). NIAMS has CRADAs with Astra Zeneca and Bristol Myers Squibb. These CRADA did not  
427 financially support the experimental results presented herein.

428

429 **Funding/Support:** This research was principally supported through research awards to BMW  
430 from the Division of Intramural Research (DIR) Program of the National Institute of Dental and  
431 Craniofacial Research of the National Institutes of Health (NIH/NIDCR ZIA: DE000704).  
432 Additional funding and support from the DIR Program of the National Institute of Arthritis and  
433 Musculoskeletal and Skin Diseases of the NIH (NIH/NIAMS ZIA: AR041199).

434

435 **Acknowledgements:** The authors provide their emphatic appreciation to the subjects for their  
436 unwavering support of our clinical studies through their volunteerism. We also thank the support  
437 and staff of the NIDCR Office of the Clinical Director, NIDCR Dental Clinic, the National Eye  
438 Institute Ophthalmology Clinic, and the NCI Center for Cancer Research Anatomic Pathology.

## 439 References

- 440 1. Mavragani CP, Moutsopoulos HM. Sjögren's syndrome: Old and new therapeutic targets. *J*  
441 *Autoimmun* 2020;110:102364. doi: 10.1016/j.jaut.2019.102364 [published Online First:  
442 20191209]
- 443 2. Hall JC, Baer AN, Shah AA, et al. Molecular Subsetting of Interferon Pathways in Sjögren's  
444 Syndrome. *Arthritis Rheumatol* 2015;67(9):2437-46. doi: 10.1002/art.39204
- 445 3. Moutsopoulos HM. Sjögren's syndrome: autoimmune epithelitis. *Clin Immunol Immunopathol*  
446 1994;72(2):162-5. doi: 10.1006/clin.1994.1123
- 447 4. Mariette X, Criswell LA. Primary Sjögren's Syndrome. *N Engl J Med* 2018;378(10):931-39.  
448 doi: 10.1056/NEJMcp1702514
- 449 5. Gandolfo S, Ciccia F. JAK/STAT Pathway Targeting in Primary Sjögren Syndrome.  
450 *Rheumatol Immunol Res* 2022;3(3):95-102. doi: 10.2478/rir-2022-0017 [published  
451 Online First: 20221020]
- 452 6. Shiboski CH, Shiboski SC, Seror R, et al. 2016 American College of Rheumatology/European  
453 League Against Rheumatism Classification Criteria for Primary Sjögren's Syndrome: A  
454 Consensus and Data-Driven Methodology Involving Three International Patient Cohorts.  
455 *Arthritis Rheumatol* 2017;69(1):35-45. doi: 10.1002/art.39859 [published Online First:  
456 20161026]
- 457 7. Warner BM, Baer AN, Lipson EJ, et al. Sicca Syndrome Associated with Immune Checkpoint  
458 Inhibitor Therapy. *Oncologist* 2019;24(9):1259-69. doi: 10.1634/theoncologist.2018-  
459 0823 [published Online First: 20190417]
- 460 8. Jang S-I, Tandon M, Teos L, et al. Dual function of miR-1248 links interferon induction and  
461 calcium signaling defects in Sjögren's syndrome. *eBioMedicine* 2019;48:526-38. doi:  
462 10.1016/j.ebiom.2019.09.010
- 463 9. Huang N, Pérez P, Kato T, et al. SARS-CoV-2 infection of the oral cavity and saliva. *Nat Med*  
464 2021;27(5):892-903. doi: 10.1038/s41591-021-01296-8 [published Online First:  
465 20210325]
- 466 10. Yin H, Pranzatelli TJF, French BN, et al. Sclerosing Sialadenitis Is Associated With Salivary  
467 Gland Hypofunction and a Unique Gene Expression Profile in Sjögren's Syndrome. *Front*  
468 *Immunol* 2021;12:699722. doi: 10.3389/fimmu.2021.699722 [published Online First:  
469 20210730]
- 470 11. Stirling DR, Swain-Bowden MJ, Lucas AM, et al. CellProfiler 4: improvements in speed,  
471 utility and usability. *BMC Bioinformatics* 2021;22(1):433. doi: 10.1186/s12859-021-  
472 04344-9 [published Online First: 20210910]
- 473 12. Candia J, Cheung F, Kotliarov Y, et al. Assessment of Variability in the SOMAscan Assay.  
474 *Sci Rep* 2017;7(1):14248. doi: 10.1038/s41598-017-14755-5 [published Online First:  
475 20171027]
- 476 13. Yao Y, Higgs BW, Morehouse C, et al. Development of Potential Pharmacodynamic and  
477 Diagnostic Markers for Anti-IFN- $\alpha$  Monoclonal Antibody Trials in Systemic Lupus  
478 Erythematosus. *Hum Genomics Proteomics* 2009;2009 doi: 10.4061/2009/374312  
479 [published Online First: 20091117]
- 480 14. Gupta S, Tatouli IP, Rosen LB, et al. Distinct Functions of Autoantibodies Against Interferon  
481 in Systemic Lupus Erythematosus: A Comprehensive Analysis of Anticytokine  
482 Autoantibodies in Common Rheumatic Diseases. *Arthritis Rheumatol* 2016;68(7):1677-  
483 87. doi: 10.1002/art.39607



- 484 15. Crow MK, Wohlgemuth J. Microarray analysis of gene expression in lupus. *Arthritis Res*  
485 *Ther* 2003;5(6):279-87. doi: 10.1186/ar1015 [published Online First: 20031013]
- 486 16. Kirou KA, Lee C, George S, et al. Activation of the interferon-alpha pathway identifies a  
487 subgroup of systemic lupus erythematosus patients with distinct serologic features and  
488 active disease. *Arthritis Rheum* 2005;52(5):1491-503. doi: 10.1002/art.21031
- 489 17. Baechler EC, Batliwalla FM, Karypis G, et al. Interferon-inducible gene expression signature  
490 in peripheral blood cells of patients with severe lupus. *Proc Natl Acad Sci U S A*  
491 2003;100(5):2610-5. doi: 10.1073/pnas.0337679100 [published Online First: 20030225]
- 492 18. Smith MA, Chiang CC, Zerrouki K, et al. Using the circulating proteome to assess type I  
493 interferon activity in systemic lupus erythematosus. *Sci Rep* 2020;10(1):4462. doi:  
494 10.1038/s41598-020-60563-9 [published Online First: 20200310]
- 495 19. Haldorsen K, Moen K, Jacobsen H, et al. Exocrine function in primary Sjögren syndrome:  
496 natural course and prognostic factors. *Ann Rheum Dis* 2008;67(7):949-54. doi:  
497 10.1136/ard.2007.074203 [published Online First: 20071025]
- 498 20. Netea MG, Domínguez-Andrés J, Barreiro LB, et al. Defining trained immunity and its role  
499 in health and disease. *Nat Rev Immunol* 2020;20(6):375-88. doi: 10.1038/s41577-020-  
500 0285-6 [published Online First: 20200304]
- 501 21. Seror R, Nocturne G, Mariette X. Current and future therapies for primary Sjögren  
502 syndrome. *Nature Reviews Rheumatology* 2021;17(8):475-86. doi: 10.1038/s41584-021-  
503 00634-x
- 504 22. Marketos N, Cinoku I, Rapti A, et al. Type I interferon signature in Sjögren's syndrome:  
505 pathophysiological and clinical implications. *Clin Exp Rheumatol* 2019;37 Suppl  
506 118(3):185-91. [published Online First: 2019/08/04]
- 507 23. Nordmark G, Alm GV, Rönnblom L. Mechanisms of Disease: primary Sjögren's syndrome  
508 and the type I interferon system. *Nat Clin Pract Rheumatol* 2006;2(5):262-9. doi:  
509 10.1038/ncprheum0173
- 510 24. Nezos A, Gravani F, Tassidou A, et al. Type I and II interferon signatures in Sjögren's  
511 syndrome pathogenesis: Contributions in distinct clinical phenotypes and Sjögren's  
512 related lymphomagenesis. *J Autoimmun* 2015;63:47-58. doi: 10.1016/j.jaut.2015.07.002  
513 [published Online First: 20150714]
- 514 25. Soret P, Le Dantec C, Desvaux E, et al. A new molecular classification to drive precision  
515 treatment strategies in primary Sjögren's syndrome. *Nat Commun* 2021;12(1):3523. doi:  
516 10.1038/s41467-021-23472-7 [published Online First: 20210610]
- 517 26. Ha YJ, Choi YS, Kang EH, et al. Increased expression of interferon- $\lambda$  in minor salivary  
518 glands of patients with primary Sjögren's syndrome and its synergic effect with  
519 interferon- $\alpha$  on salivary gland epithelial cells. *Clin Exp Rheumatol* 2018;36 Suppl  
520 112(3):31-40. [published Online First: 2017/04/20]
- 521 27. Båve U, Nordmark G, Lövgren T, et al. Activation of the type I interferon system in primary  
522 Sjögren's syndrome: a possible etiopathogenic mechanism. *Arthritis Rheum*  
523 2005;52(4):1185-95. doi: 10.1002/art.20998 [published Online First: 2005/04/09]
- 524 28. Gottenberg JE, Cagnard N, Lucchesi C, et al. Activation of IFN pathways and plasmacytoid  
525 dendritic cell recruitment in target organs of primary Sjögren's syndrome. *Proc Natl Acad*  
526 *Sci U S A* 2006;103(8):2770-5. doi: 10.1073/pnas.0510837103 [published Online First:  
527 20060213]
- 528 29. Hall JC, Casciola-Rosen L, Berger AE, et al. Precise probes of type II interferon activity  
529 define the origin of interferon signatures in target tissues in rheumatic diseases. *Proc Natl*

- 530 *Acad Sci U S A* 2012;109(43):17609-14. doi: 10.1073/pnas.1209724109 [published  
531 Online First: 20121008]
- 532 30. Aota K, Yamanoi T, Kani K, et al. Inhibition of JAK-STAT Signaling by Baricitinib Reduces  
533 Interferon- $\gamma$ -Induced CXCL10 Production in Human Salivary Gland Ductal Cells.  
534 *Inflammation* 2021;44(1):206-16. doi: 10.1007/s10753-020-01322-w
- 535 31. Chen X, Jiang S, Zhou Z, et al. Increased expression of interleukin-21-inducible genes in  
536 minor salivary glands are associated with primary Sjögren's syndrome disease  
537 characteristics. *Rheumatology (Oxford)* 2021;60(6):2979-89. doi:  
538 10.1093/rheumatology/keaa695
- 539 32. Wakamatsu E, Matsumoto I, Yasukochi T, et al. Overexpression of phosphorylated STAT-  
540 1alpha in the labial salivary glands of patients with Sjögren's syndrome. *Arthritis Rheum*  
541 2006;54(11):3476-84. doi: 10.1002/art.22176
- 542 33. Pertovaara M, Silvennoinen O, Isomäki P. Cytokine-induced STAT1 activation is increased  
543 in patients with primary Sjögren's syndrome. *Clin Immunol* 2016;165:60-7. doi:  
544 10.1016/j.clim.2016.03.010 [published Online First: 20160317]
- 545 34. Zheng Q, Liu L, Wang B, et al. Phosphorylated signal transducer and activator of  
546 transcription proteins 1 in salivary glandular tissue: an important histological marker for  
547 diagnosis of primary Sjögren's syndrome. *RMD Open* 2023;9(1) doi: 10.1136/rmdopen-  
548 2022-002694
- 549 35. Vartoukian SR, Tilakaratne WM, Seoudi N, et al. Dysregulation of the suppressor of  
550 cytokine signalling 3-signal transducer and activator of transcription-3 pathway in the  
551 aetiopathogenesis of Sjögren's syndrome. *Clin Exp Immunol* 2014;177(3):618-29. doi:  
552 10.1111/cei.12377
- 553 36. Singh N, Cohen PL. The T cell in Sjogren's syndrome: force majeure, not spectateur. *J*  
554 *Autoimmun* 2012;39(3):229-33. doi: 10.1016/j.jaut.2012.05.019 [published Online First:  
555 20120617]
- 556 37. Reich NC. STAT3 revs up the powerhouse. *Sci Signal* 2009;2(90):pe61. doi:  
557 10.1126/scisignal.290pe61 [published Online First: 20090929]
- 558 38. Davies R, Sarkar I, Hammenfors D, et al. Single Cell Based Phosphorylation Profiling  
559 Identifies Alterations in Toll-Like Receptor 7 and 9 Signaling in Patients With Primary  
560 Sjögren's Syndrome. *Front Immunol* 2019;10:281. doi: 10.3389/fimmu.2019.00281  
561 [published Online First: 20190221]
- 562 39. Lai SY, Johnson FM. Defining the role of the JAK-STAT pathway in head and neck and  
563 thoracic malignancies: implications for future therapeutic approaches. *Drug Resist Updat*  
564 2010;13(3):67-78. doi: 10.1016/j.drug.2010.04.001 [published Online First: 20100514]
- 565 40. Gadina M, Le MT, Schwartz DM, et al. Janus kinases to jakinibs: from basic insights to  
566 clinical practice. *Rheumatology (Oxford)* 2019;58(Suppl 1):i4-i16. doi:  
567 10.1093/rheumatology/key432
- 568 41. O'Shea JJ, Kontzias A, Yamaoka K, et al. Janus kinase inhibitors in autoimmune diseases.  
569 *Ann Rheum Dis* 2013;72 Suppl 2(0 2):ii111-5. doi: 10.1136/annrheumdis-2012-202576
- 570 42. ANNEX I SUMMARY OF PRODUCT CHARACTERISTICS. 2017
- 571 43. Xeljanz (tofacitinib) prescribing information. 2022
- 572 44. van Vollenhoven RF, Fleischmann R, Cohen S, et al. Tofacitinib or adalimumab versus  
573 placebo in rheumatoid arthritis. *N Engl J Med* 2012;367(6):508-19. doi:  
574 10.1056/NEJMoa1112072



- 575 45. Lee EB, Fleischmann R, Hall S, et al. Tofacitinib versus methotrexate in rheumatoid arthritis.  
576 *N Engl J Med* 2014;370(25):2377-86. doi: 10.1056/NEJMoa1310476
- 577 46. Fleischmann R, Mysler E, Hall S, et al. Efficacy and safety of tofacitinib monotherapy,  
578 tofacitinib with methotrexate, and adalimumab with methotrexate in patients with  
579 rheumatoid arthritis (ORAL Strategy): a phase 3b/4, double-blind, head-to-head,  
580 randomised controlled trial. *Lancet* 2017;390(10093):457-68. doi: 10.1016/s0140-  
581 6736(17)31618-5 [published Online First: 20170616]
- 582 47. Traves PG, Murray B, Campigotto F, et al. JAK selectivity and the implications for clinical  
583 inhibition of pharmacodynamic cytokine signalling by filgotinib, upadacitinib, tofacitinib  
584 and baricitinib. *Ann Rheum Dis* 2021;80(7):865-75. doi: 10.1136/annrheumdis-2020-  
585 219012 [published Online First: 20210319]
- 586 48. Burke JR, Cheng L, Gillooly KM, et al. Autoimmune pathways in mice and humans are  
587 blocked by pharmacological stabilization of the TYK2 pseudokinase domain. *Sci Transl*  
588 *Med* 2019;11(502) doi: 10.1126/scitranslmed.aaw1736
- 589

## 590 **Figure Legends**

### 591 **Figure 1: Bulk sequencing of minor salivary gland and IFN signature**

592 (A) Overview of MSG biopsy and whole transcriptomic analysis using RNAseq from 22 SjD and  
593 11 HV. (B) Heatmap illustrating the top 250 DEGs in MSG between SjD and HV highlighting  
594 multiple ISGs, cytokines, and interleukins, in the DEG. Immune pathway genes, including ISGs  
595 (e.g., *IFI44L*, *IFI44*, *MX1*, *CXCL13*), were upregulated whereas canonical salivary genes (e.g.,  
596 *BPIFB2*, *PIP*, *ZG16B*) were down regulated in SjD. (C) Similarly, a volcano plot showing the  
597 DEGs between SjD and HV, in which some representative genes were highlighted. MSGs from  
598 SjD subjects were transcriptionally more active with 2773 upregulated versus 468 downregulated  
599 genes. (D) Pathway enrichment analysis identified JAK-STAT Pathway as one of the top three  
600 differentially utilized pathway amongst the 25 significantly enriched pathways in SjD at a  $p$ -  
601  $adj < 0.01$  (E, G) Calculated Type-I and Type-II IFN scores revealed 2 through 2.5-fold mean  
602 increases in SjD MSGs compared to HV. Differences in mean values were compared using the  
603 Mann-Whitney U-test at a  $p < 0.05$  deemed significant. (F, H) The activated IFN signature noted  
604 in our bulk RNAseq positively correlated with FS in the glands. Spearman correlation analysis was  
605 used to assess the significance between correlated values at a  $p < 0.05$ . MSG, minor salivary gland;  
606 RNAseq, RNA sequencing; SjD, Sjogren's Disease; HV, healthy volunteer; DEGs, differentially  
607 expressed genes; ISG, interferon stimulated genes; FS, focus score.

608

### 609 **Figure 2: Immunofluorescence microscopy**

610 (A) Overview of MSG biopsy, image acquisition and flow cytometry. (B) MSG IF image showing  
611 upregulated expression of JAK1 and JAK3 in SjD epithelial and infiltrating immune cells. JAK3  
612 was especially enrich in ductal cells. Cellular proportion changes in the SjD MSGs showed greater

613 numbers of immune cells, less numbers of epithelial cells. (C) Mean fluorescence of KRT18, JAK1  
614 and JAK3 in SjD and non-SjD showing cellular proportion in the MSGs. Expression of JAK1  
615 localized to immune cells (+6%;  $p < 0.0001$ , Mann-Whitney Test) but JAK3 expression was seen  
616 in both epithelial and infiltrating immune cells (35% and 15%, respectively;  $p < 0.0001$ , Mann-  
617 Whitney Test). (D) Cellular population change in 7 SjD and 6 non-SjD was characterized by flow  
618 cytometry showed reduced numbers of epithelial cells and increased numbers of infiltrating  
619 immune cells in SjD MSGs compared to controls. (E) Flow cytometry of MSG represented the  
620 frequency of pSTAT proteins: pSTAT1 (2.1-fold,  $p = 0.017$ ), pSTAT3(Ser727) (2.2-fold,  $p = 0.031$ ),  
621 and pSTAT6 (3.3-fold,  $p = 0.112$ ) were higher at baseline in SjD epithelial cells compared to non-  
622 SjD. Although not reaching the threshold of statistical significance, the frequency of pSTAT  
623 proteins (i.e., pSTAT3(Ser727) ( $p = 0.056$ )) on CD45+ cells showed a similar frequency of pSTAT  
624 proteins in the SjD MSG. P value was calculated using Welch's test. MSG, minor salivary gland;  
625 IF, immune fluorescent; SjD, Sjogren's Disease; KRT18, Keratin-18.

626

### 627 **Figure 3: Single cell RNAseq and pSTATs frequencies of MSG**

628 (A) UMAP embedding of the entire dataset colored by generated clusters labelled by cell type  
629 annotation. From all profiled MSG samples from 7 SjD and 5 non-SjD, Leiden clustering identified  
630 11 different cell clusters corresponding to mucous (*MUC5B*) and seromucous acinar cells (*MUC7*),  
631 ductal cells (*SI00A2*), plasma cells (*IGHA*, *IGHG1*), fibroblasts (*COL1A2*), myoepithelial  
632 (*KRT14*), pericytes (*ACTA2*), B-cells (*CD79A*), antigen presenting cells (*HLA-DRA*, *CD68*), T-  
633 lymphocytes (*CD3D*), and erythrocytes (*HBB*) (n=51736 cells). (B) Differential of cell density  
634 showing increased immune cell infiltration in SjD. (C) The top ten DEG in each of the cell types  
635 were dominated by ISGs including increased expression *B2M*, *HLA-B*, *SAA1*, *IL32*, and *MGP*. (D)

636 Differential expression of IFN score in SjD and non-SjD, immune cells showed the biggest fold-  
637 changes in IFN score were in infiltrating immune cells (e.g., plasma cells: 700-fold, APCs: 400-  
638 fold; T cells: 300-fold; seromucous cells: 250-fold; ductal epithelial cells: 250-fold) exhibited  
639 higher IFN scores. (E) Fold change expression of JAK-STAT genes on all cell types. *JAK1* was  
640 the most ubiquitously expressed in MSGs and Seromucous acinar cells showed increased  
641 expression of all *JAKs*. UMAP, Uniform manifold approximation and projection; MSG, minor  
642 salivary gland; SjD, Sjogren's Disease; DEG, differentially expressed genes.

643

#### 644 **Figure 4: Single cell RNaseq and pSTATs frequencies of PBMC**

645 (A) Overview of using patient's serum and PBMC for several assays. (B) Somalogic aptamer-  
646 based 1.3K target proteomics analysis revealed most of proteins were significantly upregulated in  
647 serum from SjD in volcano plot showing protein expression, in which some representative genes  
648 were highlighted. (C) IFN regulated proteins were found to be upregulated in SjD serum  
649 ( $p < 0.0001$ ). P value was calculated using Kruskal-Wallis test. (D) UMAP embedding of the entire  
650 dataset colored by generated clusters labelled by cell type annotation. Leiden clustering identified  
651 10 different cell clusters from all profiled PBMC samples from 8 SjD and 6 non-SjD ( $n=206687$   
652 cells). (E) The upregulated genes were associated with immune and inflammatory responses  
653 revealed by functional annotation analysis from PBMC scRNaseq. (F) Differential expression of  
654 IFN score, monocytes had the highest expression of ISGs, followed by dendritic cells and then NK  
655 cells. SjD, Sjogren's Disease; UMAP, Uniform manifold approximation and projection; RNaseq,  
656 RNA sequencing; ISG, interferon stimulated genes.

657

#### 658 **Figure 5: Basal pSTATs frequencies in PBMCs**

659 (A-D) Flow cytometry analysis revealed basal pSTATs levels in PBMCs were upregulated in 21  
660 SjD compared to 10 HV. P value was calculated using Welch's test. SjD, Sjogren's Disease; HV,  
661 healthy volunteer.

662

### 663 **Figure 6: Treatment effects of tofacitinib in PBMCs**

664 (A) Overview of using PBMC treated by tofacitinib for scRNAseq and FACS. PBMCs were  
665 treated with or without 5mM tofacitinib for 1 hour prior to IFN $\beta$  treatment for 30 minutes or 6  
666 hours, respectively. (B) Treatment with tofacitinib blocked STATs phosphorylation status induced  
667 by IFN $\beta$  stimulation in PBMCs from SjD. P value was calculated using Mann-Whitney test. (C)  
668 UMAP embedding of the entire dataset colored by generated clusters labelled by 4 general cell  
669 type annotations. (D) Differential utilization of IFN signature of each condition showed tofacitinib  
670 abolished the IFN $\beta$ -induced IFN score to baseline level. (E) Volcano plot showing DEGs by  
671 pseudobulk analysis across SjD and HV, in which some representative genes were highlighted. T  
672 cells (129 genes) and monocytes (61 genes) exhibited greater numbers of downregulated ISGs in  
673 the context of tofacitinib. ISGs (e.g., *IFIT1*, *IFIT3*) were among the top DEG in all subsets after  
674 IFN $\beta$  and tofacitinib normalizing this response. RNAseq, RNA sequencing; SjD, Sjogren's  
675 Disease; DEG, differentially expressed genes; HV, healthy volunteer; ISG, interferon stimulated  
676 genes.

677

### 678 **Figure 7: Treatment effects of tofacitinib in pSGECs**

679 (A) Overview of using pSGEC treated by tofacitinib for IF and RT-qPCR. pSGEC were derived  
680 from fresh MSG biopsies. (B, C) Differential expression of pSTAT1 in pSGECs. Tofacitinib  
681 treatment mitigated IFN $\beta$ -induced STAT1 phosphorylation in both the nucleus and cytosol. P

682 value was calculated using Kruskal-Wallis test. (D) Expression change of ISGs (*i.e.*, *CXCL10*,  
683 *ISG15*, *MX1*) on pSGECs showing dose-dependently decreased IFN $\beta$ -induced ISGs mRNA  
684 expression. 5 SjD and 5 HV (n=5 individuals' lines, respectively). 1 SjD and 1 HV samples were  
685 eliminated from MX1 result. P value was calculated using Mann-Whitney test and Kruskal-Wallis  
686 test. pSGEC, primary salivary gland epithelial cells; SjD, Sjogren's Disease; HV, healthy  
687 volunteer; ISG, interferon stimulated genes.

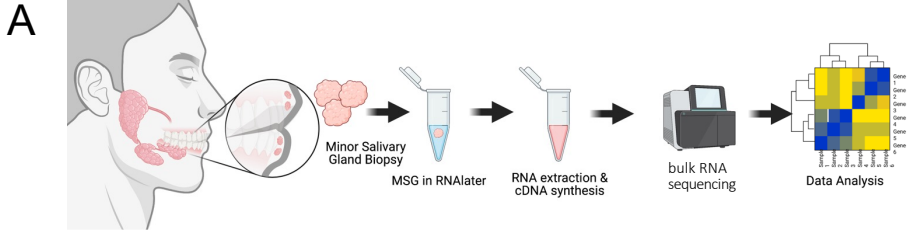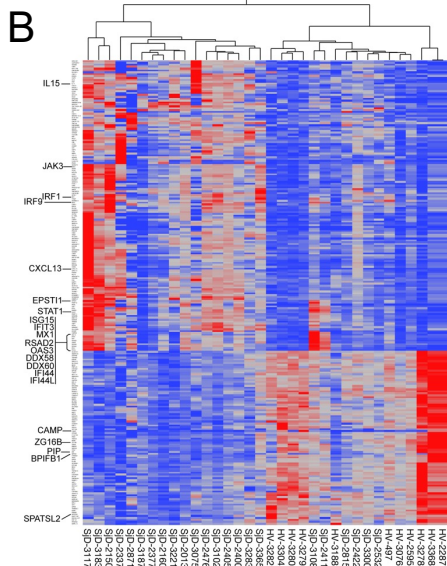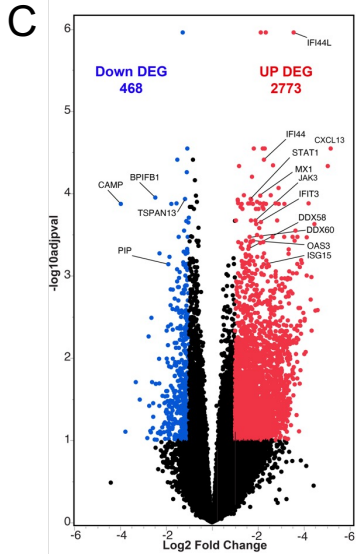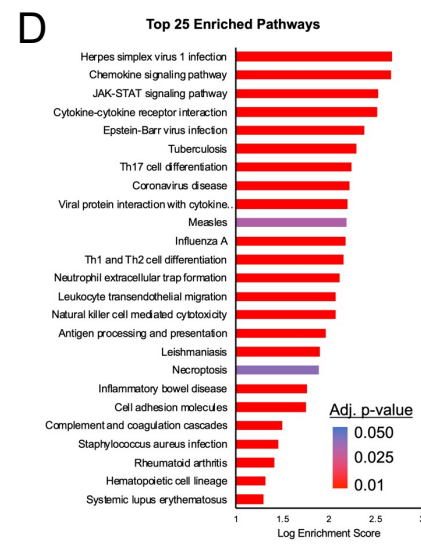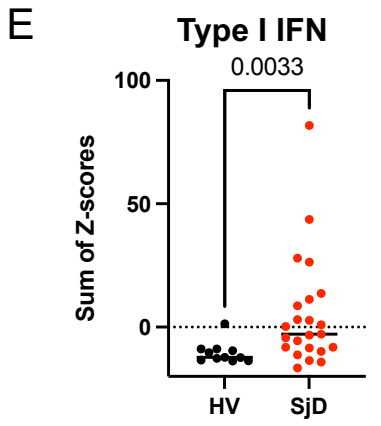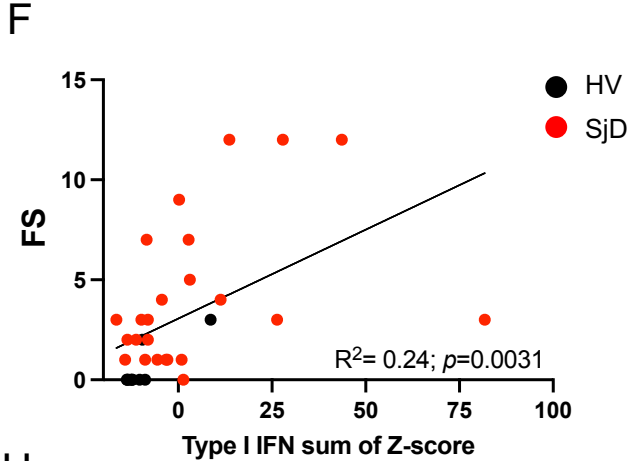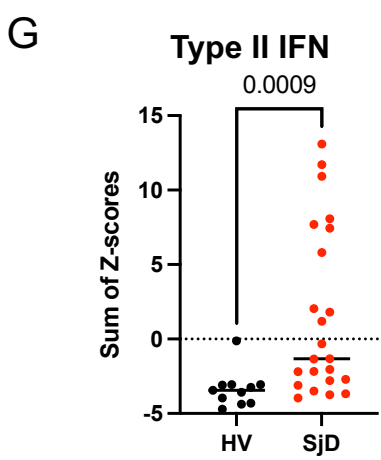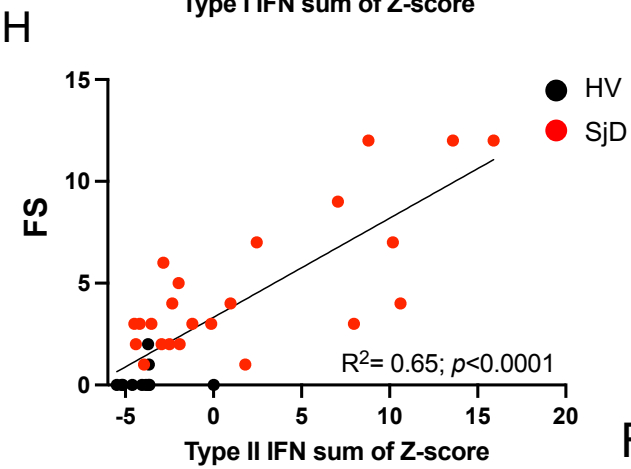

Figure 1



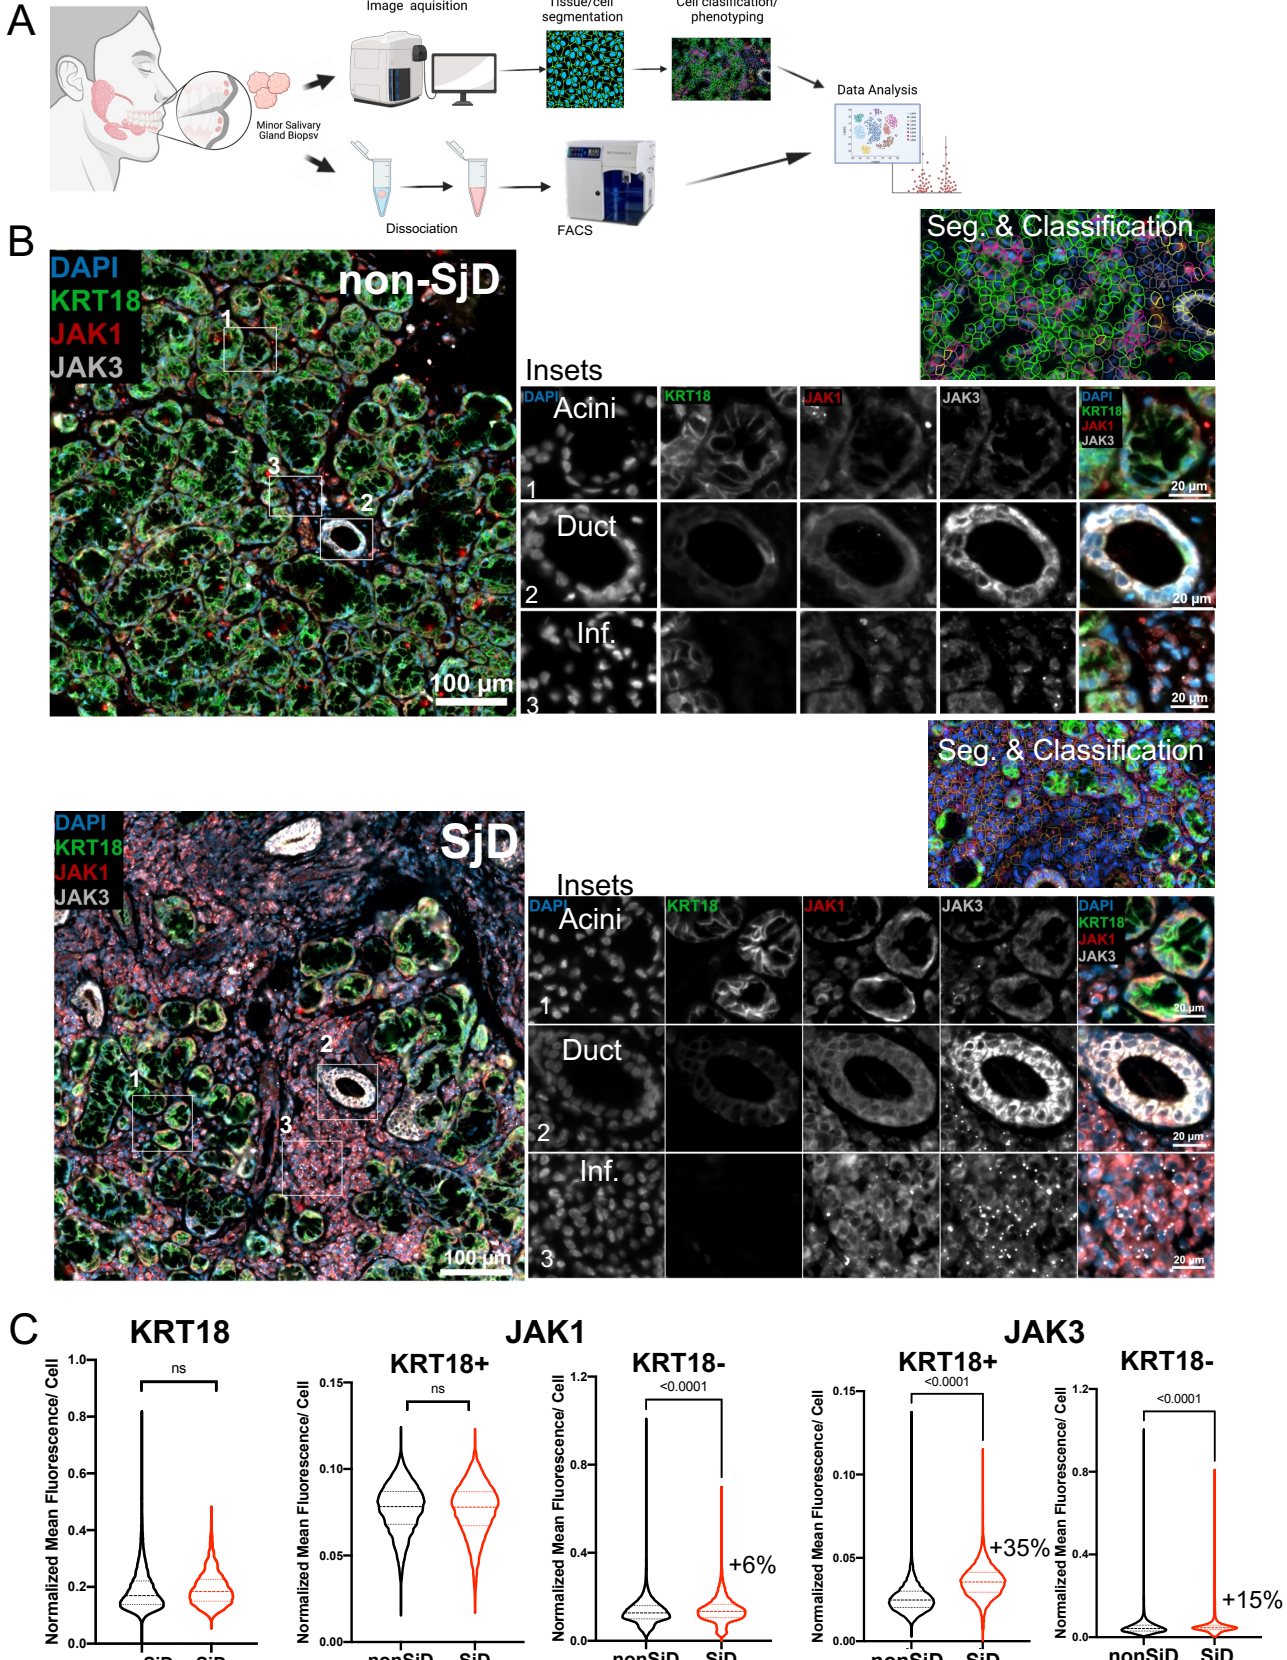

Figure 2



D

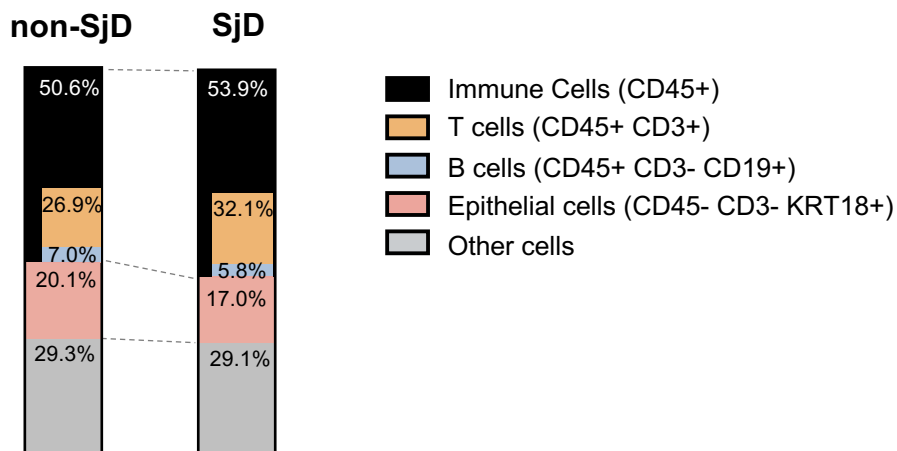

E

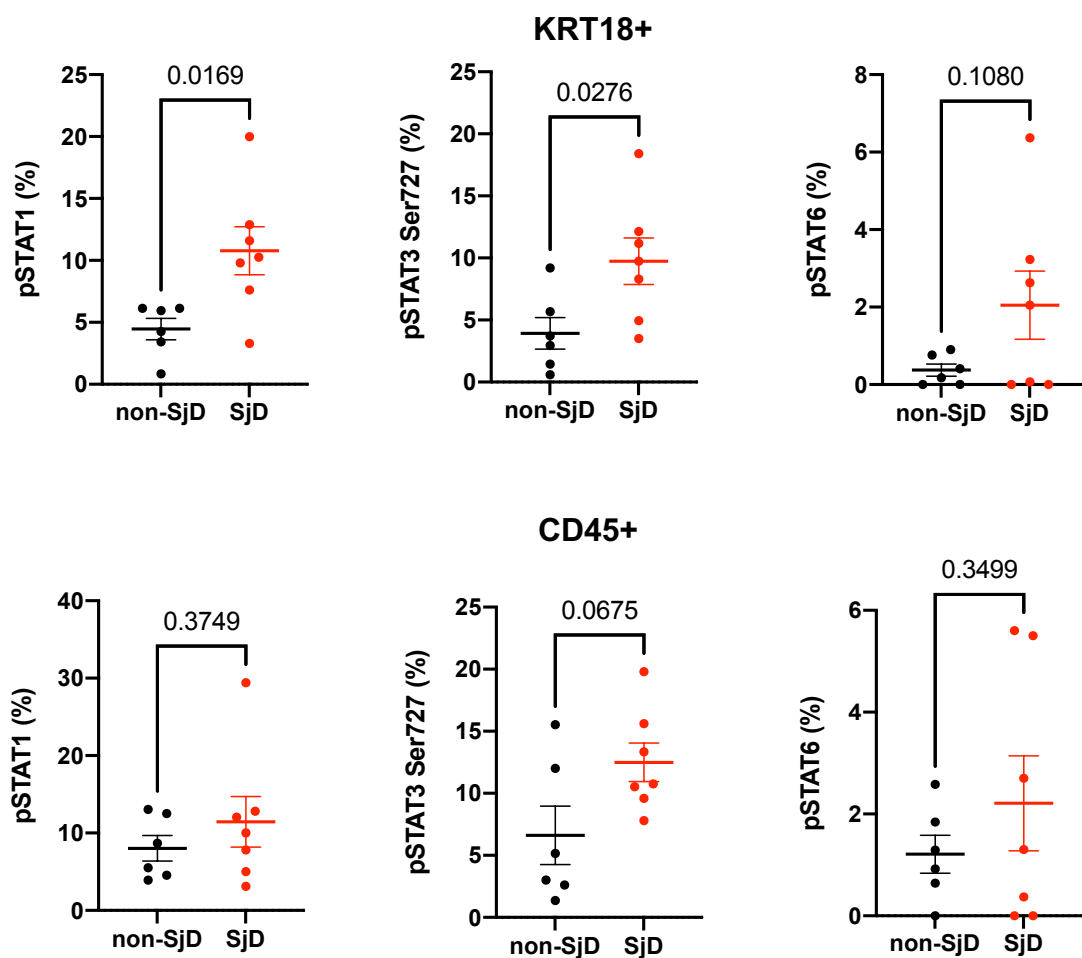

Figure 2



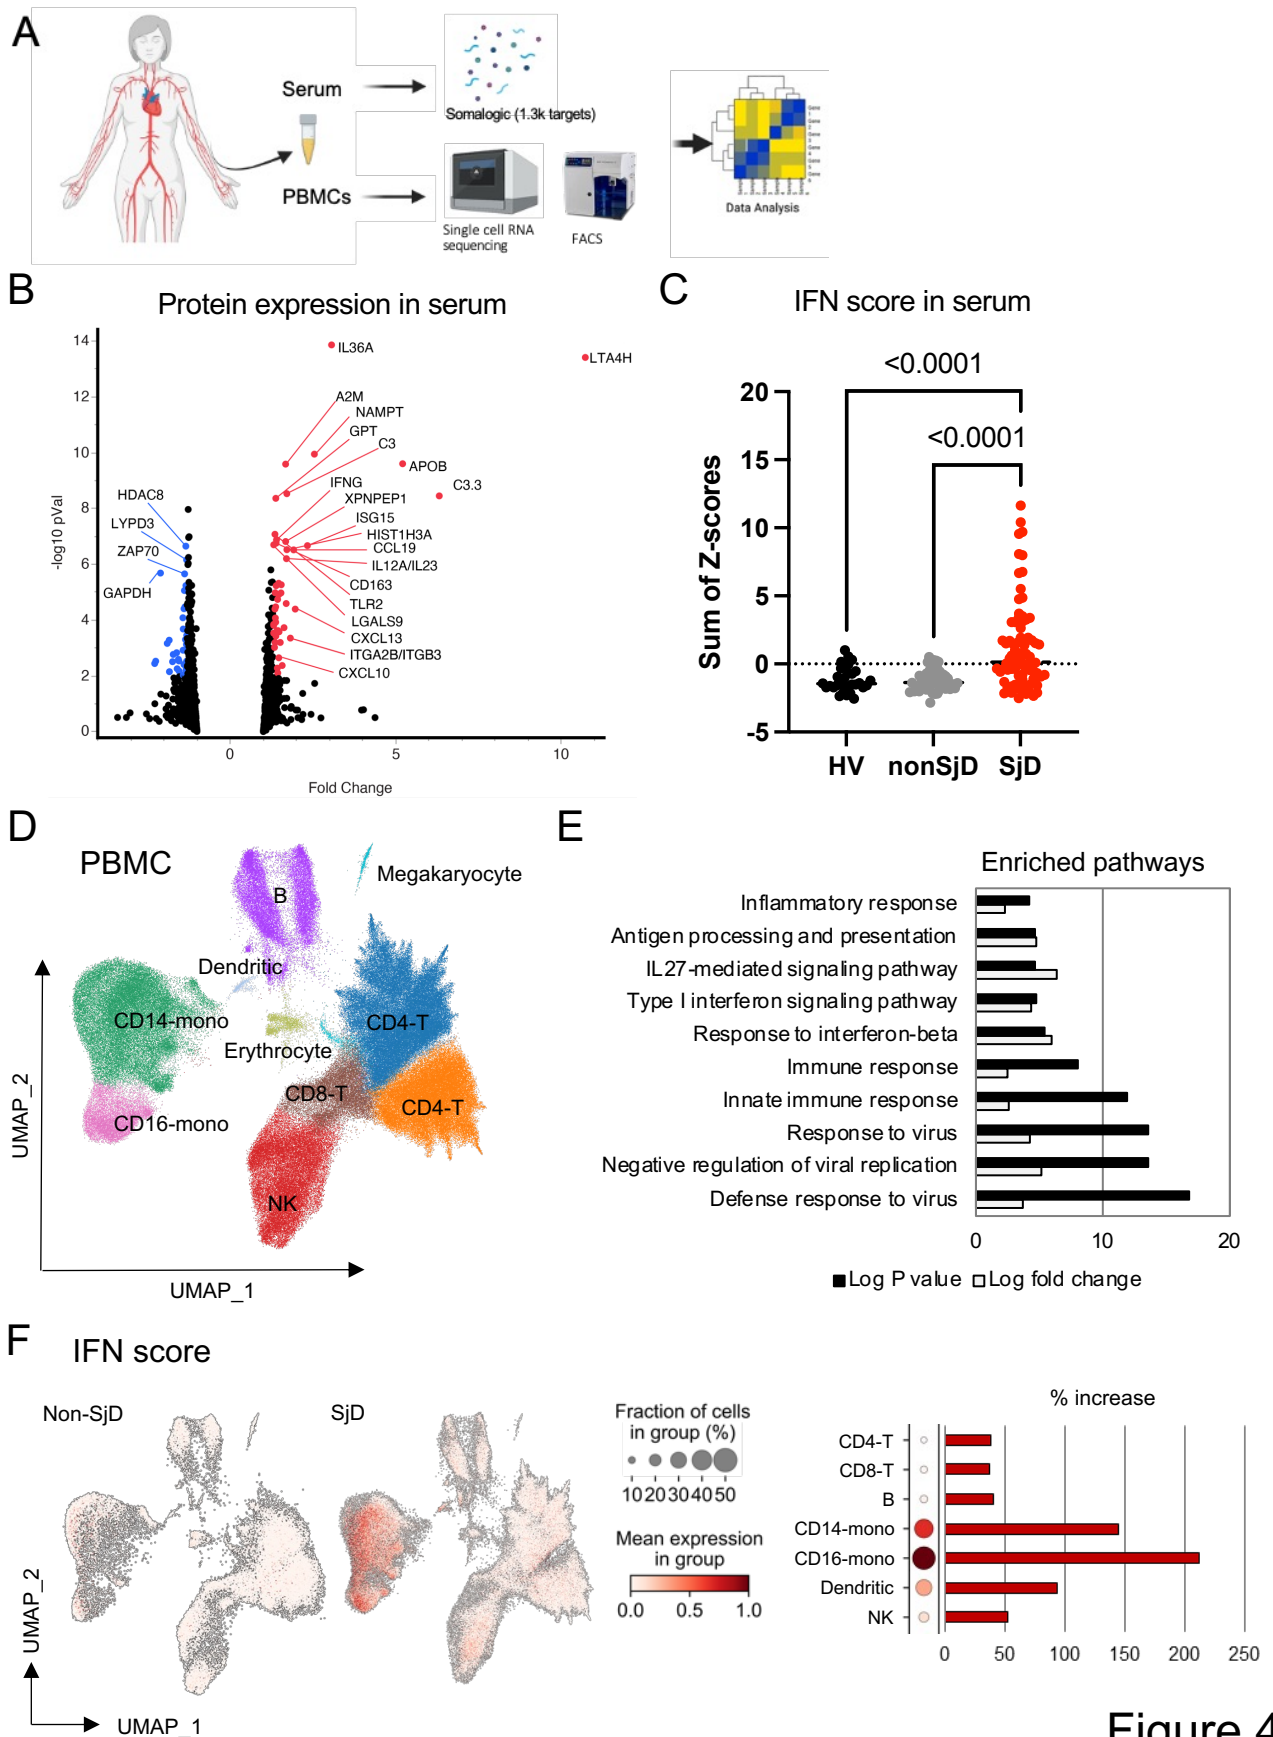

Figure 4



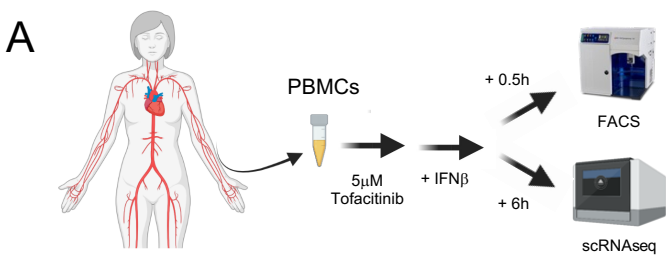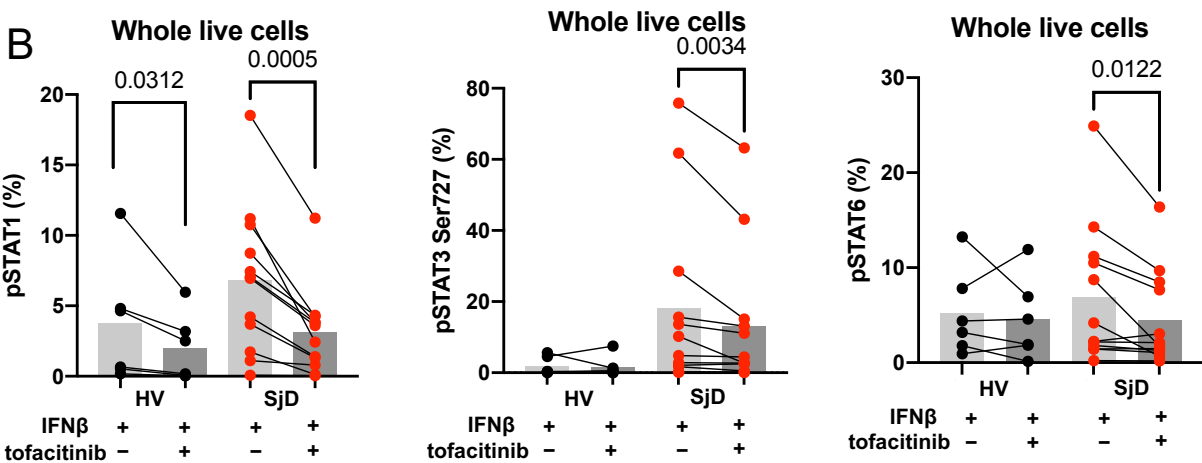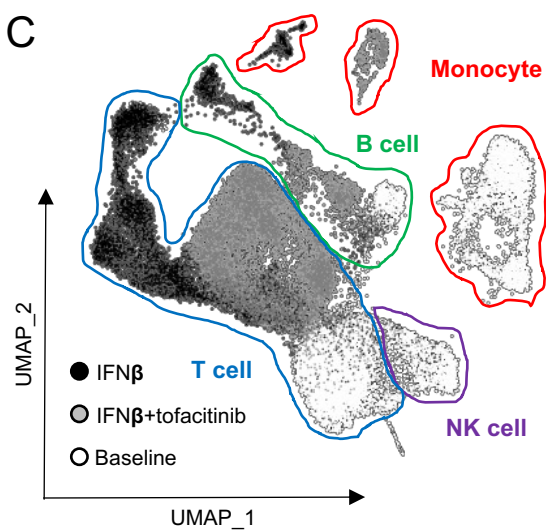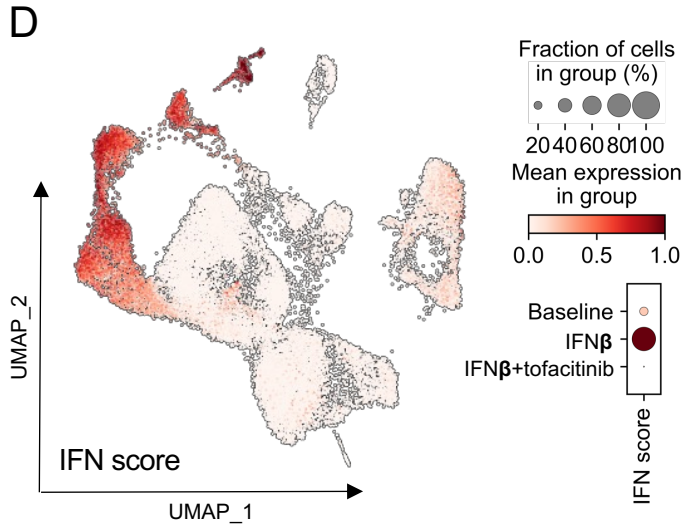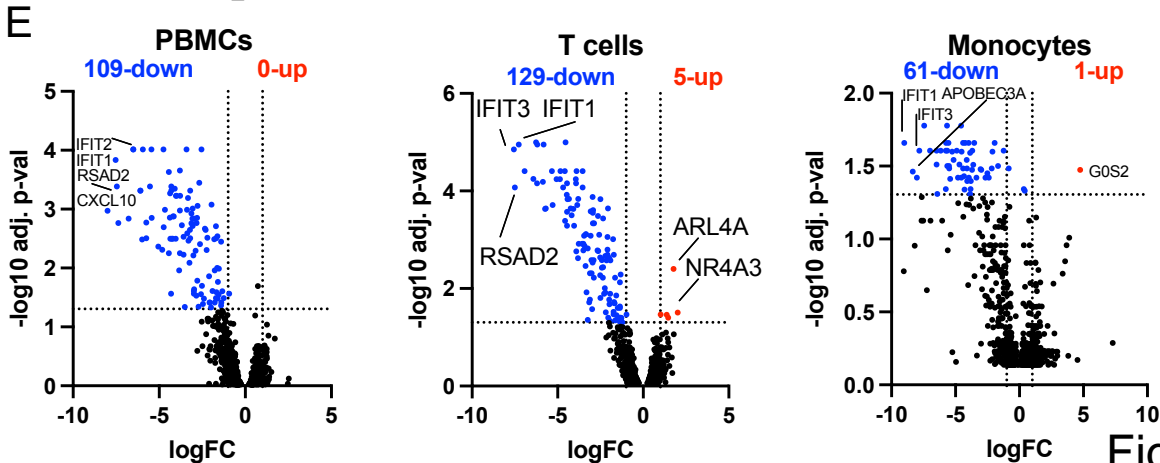

Figure 6



**A**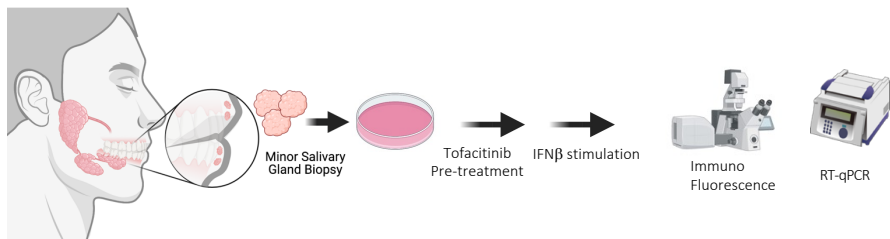**B**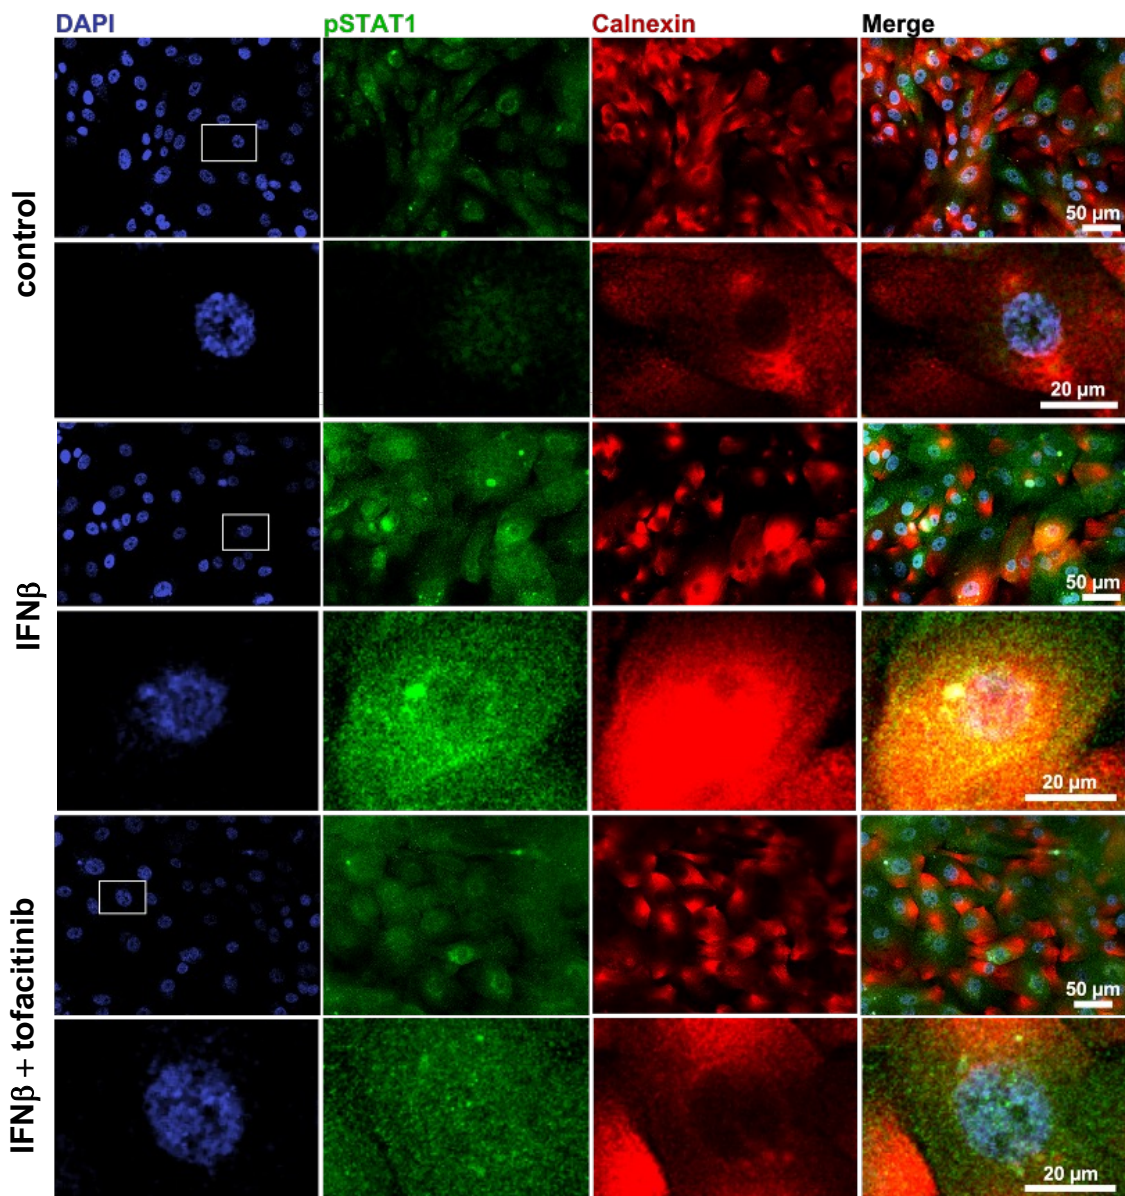

Figure 7

**C**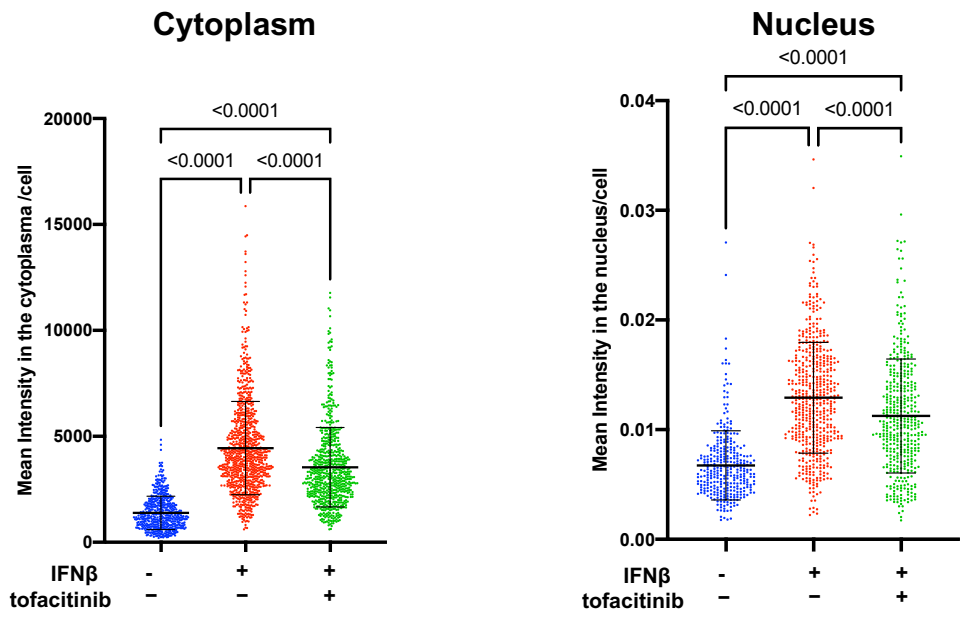**D**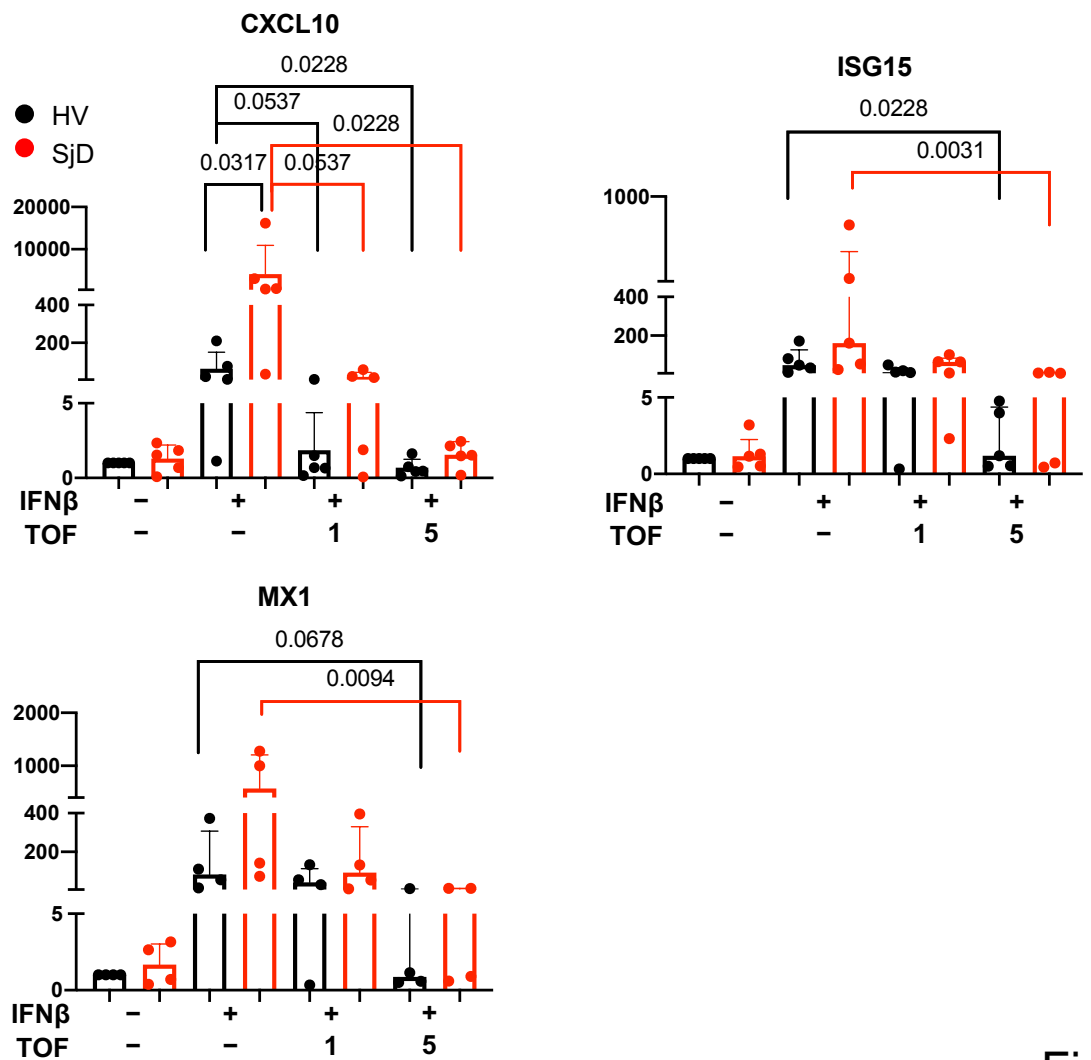

Figure 7
